# Supplementary material for: A Signature in HIV-1 Envelope Leader Peptide Associated with Transition from Acute to Chronic Infection Impacts Envelope Processing and Infectivity
Source: PLoS One. 2011 Aug 18;6(8):e23673. doi: 10.1371/journal.pone.0023673 (PMC3158090; doi:10.1371/journal.pone.0023673)
Supplement: Table S1 — Clinical characteristics of patient specimens. Adapted from Keele, et al. Supplemental Tables, S1 – S4 [8], and Gnanakaran, et al, SuppS1. Fiebig classification of plasma specimens, as described previously [28]. Risk behavior: heterosexual (H) or men who have sex with men (MSM). Estimate to most recent common ancestor (MRCA) is an estimate of the time since infection, as determined by Keele, et al. [8] (XLS) [file pone.0023673.s001.xls]

## Sheet: Sheet1
Table S1. Clinical characteristics of patient specimens
Specimen	Fiebig stage	HIV viral RNA, copies per ml	Gender	Risk behavior	Location	Poisson estimated days since MRCA (95% CI)	Position 12 Residue
TT31P	II	21826347	F	H	Trinidad	45 (39, 50)	H
PRB931	III	2000000		H	Wisconsin	42 (31, 53)	H
TT27P	IV	1489202	M	H	Trinidad	11 (6, 16)	R
700010040	V	298026	M	MSM	North Carolina	23 (17, 30)	H
12008	II	>2000000		H	Missouri	NA	H
BORI	II	2400000	M	MSM	Alabama	22 (11, 32)	R
1059	III	2800000	M	H	California	41 (24, 58)	gap
SUMA	II	939260	M	MSM	Alabama	13 (9,17)	gap
700010058	III	394649	M	H	North Carolina	36 (28,44)	N
9020	II	69238	F	H	California	25 (18, 33)	gap
9021	II	143379	M	H	California	9 (3, 15)	Q
PRB956	II	600000		H	Virginia	15 (9, 21)	Q
SC33	II	3277559	M	H	Trinidad	20 (11,28)	G
